# Supplementary material
Source: publisher figshare collection journal article supplement (https://karger.figshare.com/articles/dataset/_/5121397)
Supplement: Supplementary file 1 [file 1]

**Supplementary Movie 1.** A z-stack images with DAPI staining as shown in fig.6. This movie shows the nuclei indicated with arrowheads same as in fig.6 did not have any apoptotic profiles.
